# Supplementary material
Source: publisher figshare collection journal article supplement (https://sage.figshare.com/ndownloader/files/13816961)
Supplement: Supplementary file 1 [file 13816961]

1 **S Table 1. Recalls of medical devices in Group B according to device category.**

| Device category                                          | Approved | Overall recall |        | Design recall |        |             |             | Design recall /    |
|----------------------------------------------------------|----------|----------------|--------|---------------|--------|-------------|-------------|--------------------|
|                                                          | N        | N              | (%)    | N             | (%)    | Hardware, N | Software, N | Overall recall (%) |
| Contact lens                                             | 447      | 12             | (2.7)  | 0             | (0.0)  | 0           | 0           | 0.0                |
| Tubes and catheters                                      | 319      | 8              | (2.5)  | 1             | (0.3)  | 1           | 0           | 12.5               |
| Miscellaneous dental materials                           | 154      | 4              | (2.6)  | 0             | (0.0)  | 0           | 0           | 0.0                |
| Implantable devices and materials                        | 93       | 3              | (3.2)  | 0             | (0.0)  | 0           | 0           | 0.0                |
| Blood extracorporeal circulation device                  | 65       | 9              | (13.8) | 7             | (10.8) | 4           | 6           | 77.8               |
| Clinical chemical test devices                           | 26       | 0              | (0.0)  | 0             | (0.0)  | 0           | 0           | -                  |
| Surgical materials and orthopedic surgical materials     | 18       | 0              | (0.0)  | 0             | (0.0)  | 0           | 0           | -                  |
| Devices for laser therapy and procedures                 | 14       | 1              | (7.1)  | 1             | (7.1)  | 0           | 1           | 100                |
| Therapeutic particle acceleration equipment              | 13       | 8              | (61.5) | 7             | (53.8) | 3           | 6           | 87.5               |
| Instruments for blood drawing, transfusion, and infusion | 12       | 3              | (25.0) | 0             | (0.0)  | 0           | 0           | 0.0                |
| Syringes and puncture devices                            | 11       | 0              | (0.0)  | 0             | (0.0)  | 0           | 0           | -                  |
| Endoscope                                                | 5        | 0              | (0.0)  | 0             | (0.0)  | 0           | 0           | -                  |
| Electric surgical devices and related equipment          | 3        | 0              | (0.0)  | 0             | (0.0)  | 0           | 0           | -                  |

|                                                                  |       |    |        |    |        |   |    |      |
|------------------------------------------------------------------|-------|----|--------|----|--------|---|----|------|
| Equipment for radioisotope therapy and sealed radioactive source | 3     | 0  | (0.0)  | 0  | (0.0)  | 0 | 0  | -    |
| Radiotherapy-related equipment                                   | 2     | 1  | (50.0) | 1  | (50.0) | 0 | 1  | 100  |
| Instruments for ligature and suture                              | 1     | 0  | (0.0)  | 0  | (0.0)  | 0 | 0  | -    |
| Peritoneal dialysis devices and related instruments              | 1     | 0  | (0.0)  | 0  | (0.0)  | 0 | 0  | -    |
| Overall                                                          | 1,187 | 49 | (4.1)  | 17 | (1.4)  | 8 | 14 | 34.7 |

2 Group B: high-risk medical devices (Class III and IV) with approval standards

**S Table 2. Recalls of medical devices in Group C according to device category.**

| Device category                                             | Approved | Overall recall |        | Design recall |        |             |             | Design recall /    |
|-------------------------------------------------------------|----------|----------------|--------|---------------|--------|-------------|-------------|--------------------|
|                                                             | N        | N              | (%)    | N             | (%)    | Hardware, N | Software, N | Overall recall (%) |
| Implantable devices and materials                           | 1,101    | 32             | (2.9)  | 1             | (0.1)  | 1           | 0           | 3.1                |
| Tubes and catheters                                         | 200      | 9              | (4.5)  | 0             | (0.0)  | 0           | 0           | 0.0                |
| Bio-function regulating equipment                           | 146      | 20             | (13.7) | 16            | (11.0) | 10          | 8           | 80.0               |
| Blood extracorporeal circulation device                     | 67       | 10             | (14.9) | 2             | (3.0)  | 2           | 1           | 20.0               |
| Surgical materials and orthopedic surgical materials        | 59       | 3              | (5.1)  | 0             | (0.0)  | 0           | 0           | 0.0                |
| Devices for laser therapy and procedures                    | 46       | 4              | (8.7)  | 1             | (2.2)  | 0           | 1           | 25.0               |
| Electric surgical devices and related equipment             | 45       | 5              | (11.1) | 2             | (4.4)  | 1           | 1           | 40.0               |
| Instruments for ligature and suture                         | 37       | 2              | (5.4)  | 0             | (0.0)  | 0           | 0           | 0.0                |
| Miscellaneous procedural devices                            | 32       | 6              | (18.8) | 2             | (6.3)  | 2           | 0           | 33.3               |
| Miscellaneous bio-functional assist and alternating devices | 26       | 2              | (7.7)  | 0             | (0.0)  | 0           | 0           | 0.0                |
| Instruments for blood drawing, transfusion, and infusion    | 25       | 0              | (0.0)  | 0             | (0.0)  | 0           | 0           | -                  |
| Peritoneal dialysis devices and related instruments         | 22       | 1              | (4.5)  | 0             | (0.0)  | 0           | 0           | 0.0                |

|                                                                  |    |   |        |   |        |   |   |      |
|------------------------------------------------------------------|----|---|--------|---|--------|---|---|------|
| Equipment for radioisotope therapy and sealed radioactive source | 17 | 2 | (11.8) | 0 | (0.0)  | 0 | 0 | 0.0  |
| Miscellaneous devices for treatment or operation                 | 12 | 2 | (16.7) | 2 | (16.7) | 1 | 2 | 100  |
| Testing equipment for bio-physical phenomena                     | 8  | 2 | (25.0) | 1 | (12.5) | 1 | 1 | 50.0 |
| Radiotherapy-related equipment                                   | 8  | 1 | (12.5) | 1 | (12.5) | 0 | 1 | 100  |
| Equipment for disintegrating concretions                         | 8  | 1 | (12.5) | 0 | (0.0)  | 0 | 0 | 0.0  |
| Diagnostic nuclear medicine equipment and related equipment      | 7  | 0 | (0.0)  | 0 | (0.0)  | 0 | 0 | -    |
| Therapeutic particle acceleration equipment                      | 5  | 2 | (40.0) | 2 | (40.0) | 2 | 0 | 100  |
| Dental bonding, filling, and temporary sealing materials         | 5  | 1 | (20.0) | 0 | (0.0)  | 0 | 0 | 0.0  |
| Miscellaneous dental materials                                   | 5  | 0 | (0.0)  | 0 | (0.0)  | 0 | 0 | -    |
| Syringes and puncture devices                                    | 4  | 0 | (0.0)  | 0 | (0.0)  | 0 | 0 | -    |
| Testing equipment for bio-electric phenomena                     | 3  | 1 | (33.3) | 0 | (0.0)  | 0 | 0 | 0.0  |
| Miscellaneous equipment for laboratory testing                   | 2  | 0 | (0.0)  | 0 | (0.0)  | 0 | 0 | -    |
| Bio-phenomena monitoring devices                                 | 1  | 0 | (0.0)  | 0 | (0.0)  | 0 | 0 | -    |
| Blood testing devices                                            | 1  | 0 | (0.0)  | 0 | (0.0)  | 0 | 0 | -    |

|                                                             |       |     |       |    |       |    |    |      |
|-------------------------------------------------------------|-------|-----|-------|----|-------|----|----|------|
| Devices for dental consultation room                        | 1     | 0   | (0.0) | 0  | (0.0) | 0  | 0  | -    |
| Miscellaneous imaging X-ray related equipment and materials | 1     | 0   | (0.0) | 0  | (0.0) | 0  | 0  | -    |
| Overall                                                     | 1,894 | 106 | (5.6) | 30 | (1.6) | 20 | 15 | 28.3 |

Group C: high-risk medical devices (Class III and IV) without either standard
